# Supplementary material
Source: MDPI journal article supplement (https://www.mdpi.com/2410-3888/8/8/425)
Supplement: s1 [file s1]

Table S1. cDNA and amino acid sequences of *GLUT1* in *Hypophthalmichthys molitrix*

|                           | Length | Sequence                                                                                                                                                                                                                                                                                                                                                                                                                                                                                                                                                                                                                                                                                                                                                                                                                                                                                                                                                                                                                                                                                                                                                                                                                                                                                                                                                                                                                                                                                                                                                                                                                                                                                                                                                                                                                                                                                                                                                                                                                                                                                                                                                                                                                                                                                                                                                     |
|---------------------------|--------|--------------------------------------------------------------------------------------------------------------------------------------------------------------------------------------------------------------------------------------------------------------------------------------------------------------------------------------------------------------------------------------------------------------------------------------------------------------------------------------------------------------------------------------------------------------------------------------------------------------------------------------------------------------------------------------------------------------------------------------------------------------------------------------------------------------------------------------------------------------------------------------------------------------------------------------------------------------------------------------------------------------------------------------------------------------------------------------------------------------------------------------------------------------------------------------------------------------------------------------------------------------------------------------------------------------------------------------------------------------------------------------------------------------------------------------------------------------------------------------------------------------------------------------------------------------------------------------------------------------------------------------------------------------------------------------------------------------------------------------------------------------------------------------------------------------------------------------------------------------------------------------------------------------------------------------------------------------------------------------------------------------------------------------------------------------------------------------------------------------------------------------------------------------------------------------------------------------------------------------------------------------------------------------------------------------------------------------------------------------|
| cDNA<br>sequence          | 2104bp | AACCCCGGGAAAAGAGGCGAAGTTTCAGCTGAGTTAACGTACGTCGAA<br>ACGTCATCGAACATTTGACAAGACGTGATGGAGGGCGAAAAGCAACTG<br>ACCTGGCCGCTGATGCTGGCTGTAGGGACGGCTGTGATTGGCTCTCTTC<br>AGTTCGGCTACAACACTGGTGTAATCAATGCCCCGCAAAGTGTCATTGA<br>GGCCTTCTACAATAAGACATGGAATGATCGATATGGGAGAACATCCCTA<br>AAACAACCATCACTACCCTGTGGTCTCTGTCTGTGGCCATCTTCTCTGTG<br>GGCGGcATTGTTGGATCCTTCTCCGTTGGGCTGTTTGTCAACCGTTTTGG<br>AAGGAGAACTCCATGCTCATGGCTAATGTCCTGGCTTTCATCGCTGCAG<br>CACTCATGGGCTTCTCTAAGATGGGTGCGTCCTGGGAGATGCTCATTACT<br>GGACGGTTCGTGGTAGGCCCTTTATTCTGGTCTGTCCACAGGCTTTGTGCC<br>CATGTACGTGGGTGAGGTGGCTCCACAGCCCTCAGAGGAGCCCTTGGC<br>ACCCTTCATCAGCTGGGCATCGTTATTGGCATCCTCATGGCACAGATCTT<br>TGGTATGGACGTTATTATGGGTAACGAAACCATGTGGCCATTCTCCTGG<br>GCTTTACCTTCATCCCTGCCCTGCTGCAGTGTGTTTACTGCCCATCTGC<br>CCTGAGAGCCCTCGATTTCTCCTTATCATCCGCAATGAGGAAAACAAAG<br>CCAAATCAGTGCTTAAAAAGCTGCGCGGGACGACAGATGTGGCCACAG<br>ACATGCAGGAGATGAAGGAGGAGAGCAGACAGATGATGAGAGAGAAG<br>AAAGTCACCATTCTGAAGTGTCCGCTCTCCGCTCTACCGACAGCCCAT<br>CGCTGTAGCCATCATGCTGCAGCTGTCTCAGCAGCTGTCTGGAATCAATG<br>CTGTATTCTACTACTCTACAAAGATCTTTGAGAAGGCAGGTGTGAAACA<br>GCCGGTTTATGCCACTATCGGAGCTGGAGTCGTCAACACAGCTTTCACT<br>GTAGTGTGCTGTTTGTGGTTCGAGCGAGCGGGCCGTAGGTCCCTGCACC<br>TCTTGGGACTGCTGGGAATGGCTGGATCTGCTGTATTGATGACCATTGCT<br>CTTGCCTTGCTGGAGAAATACGACTGGATGTCCTACATAAGCATCATAGC<br>TATCTTTGGGTTTGTGGCCTTCTTTGAGATTGGACCCGGCCCCATCCCAT<br>GGTTCATTGTGGCTGAACTGTTCAAGTCAAGGCCCAAGACCCTCGGCTTT<br>TGCTGTAGCTGGATTCTCCAACTGGACCGCAAACCTTATCGTGGGCATGT<br>GCTTTCAGTATGTTGAGGAGCTCTGTGGGCCGTACGTGTTTATCATCTTC<br>ACCATATTTTACTTGGCTTCTTCATCTTCACCTACTTCAAAGTCCCAGAA<br>ACCAAGGGCCGGACGTTTCGATGAAATCTCCGCTGGTTTCCGCCAGGTAG<br>CATCAGCGGCTGAGAAGCACTACCCGAAGAGCTCAACAGCCTGGGGG<br>CGGACTCTCAACTTTAAACCCCTCCTCTGACCCTGCTTTCCTCATCTGTT<br>CACACTTCTGCACGCACCTACTGAGGAGAAGGGGTCACCAGGCTGTCTG<br>ATCAAACATTTCCCCCTTCCCGTGGCTGCACTCACCTCTTAGTCCCCC<br>AAAACCTCCCCGATGAACATGAGACATGGGGTTTGAAGGCAGGGAGTA<br>AGAGTAGTTATTATATTCCTTTTATCAGAAAGATGATTGTTTAAAGACCTG<br>TTCGAGGTGTCATATTGCAATTGGAGTCTTTTGGCTACTTTTATAAGGTTT<br>TATGTTTTTTAAATCTATCCTAACTGTTACTTCTGCTGTGCTATAAGAGAG<br>TGAAAACCTCGACCTAGCCTCTACGCTGTTGACGTCAGAAATCGACAGGT<br>CAAATTTGACTTCCATACAGCGACTGACGATTAAATACTGTATTCCAGATA<br>ACTGTATCTCTATTATGAAAGTTTTGTAGCTTTGATAAACCAGTTATCATC<br>ATTAGCTTAGCTGTGCTTAGAAGTTGAAACAATTTAACATGCATAAAAAA<br>AAAAAAAAAAAAAAAAAAAAAAAAA |
| amino<br>acid<br>sequence | 490aa  | MEGEKQLTWPLMLAVGTAVIGSLQFGYNTGVINAPQSVIEAFYNKTNWDR<br>YGENIPKTTITLWLSVAIFS VGGIVGSFSVGLFVNRFRRRNSMLMANVLA<br>FIAAALMGFSKMGASWEMLITGRFVVGLYSGLSTGFVPMYVGEVAPTALR<br>GALGTLHQLGIVIGILMAQIFGMDVIMGNETMWPFLLGFTFIPALLQCCLLP<br>ICPESPRFLLIIRNEENKAKSVLKKLRGTTDVATDMQEMKEESRQMMREKK<br>VTIPELFRSPLYRQPIAVAIMLQLSQQLSGINAVFYYSTKIFEKAGVKQPVY<br>ATIGAGVVNTAFTVVSLFVVERAGRRSLHLLGLLGMAGSAVLMTIALALL<br>EKYDWMSYISIIAIFGFVAFFEIGPGPIPWFIWAELFSQGPRPSAFVAVAGFSN<br>WTANFIVGMCIFYVEELCGPYVFIIFTIFLLGFFIFTYFKVPETKGRTFDEISA<br>GFRQVASAAEKHSPEELNSLGADSQL                                                                                                                                                                                                                                                                                                                                                                                                                                                                                                                                                                                                                                                                                                                                                                                                                                                                                                                                                                                                                                                                                                                                                                                                                                                                                                                                                                                                                                                                                                                                                                                                                                                                                                                                                                                                               |
